# Supplementary material for: Flexible Real-Time Polymerase Chain Reaction-Based Platforms for Detecting Deafness Mutations in Koreans: A Proposed Guideline for the Etiologic Diagnosis of Auditory Neuropathy Spectrum Disorder
Source: MDPI journal article supplement (doi:10.3390/diagnostics10090672), 2020-09-04
Supplement: s1 [file s1]

[illegible]

[illegible]

[illegible]
