# Supplementary material for: Flexible Real-Time Polymerase Chain Reaction-Based Platforms for Detecting Deafness Mutations in Koreans: A Proposed Guideline for the Etiologic Diagnosis of Auditory Neuropathy Spectrum Disorder
Source: MDPI journal article supplement (doi:10.3390/diagnostics10090672), 2020-09-04
Supplement: s1 [file s1]

**Table S1. Mutational spectrum of prelingual auditory neuropathy spectrum disorder (ANSD) from Korean and East Asian reports <sup>a</sup>**

| U-TOP™ HL Genotyping Kit Ver2: <i>OTOF</i> variants (p.Glu841Lys, p.Arg1856Trp, p.Leu1011Pro, p.Tyr1064Ter, and p.Arg1939Gln) |                 |           |                                                        |                                                                                                                                                |                                                                                                                                                                                           |
|-------------------------------------------------------------------------------------------------------------------------------|-----------------|-----------|--------------------------------------------------------|------------------------------------------------------------------------------------------------------------------------------------------------|-------------------------------------------------------------------------------------------------------------------------------------------------------------------------------------------|
| Author (Ethnicity) [Reference]                                                                                                | Subjects        | Phenotype | Confirmed Families<br>(biallelic <i>OTOF</i> variants) | Contribution of this kit                                                                                                                       | Others                                                                                                                                                                                    |
| Kim et al. (Korea) [14]                                                                                                       | Prelingual ANSD | DFNB9     | 11 families (22 alleles)                               | p.Arg1939Gln (9/22, 40.9%)<br>p.Glu841Lys (4/22, 18.2%)<br>p.Leu1011Pro (2/22, 9.1%)<br>p.Tyr1064Ter (2/22, 9.1%)<br>p.Arg1856Trp (2/22, 9.1%) | p.Gly1845Glu (1/22, 4.5%)<br>c.4227+5G>C (1/22, 4.5%)<br>Large genomic deletion (1/22, 4.5%)                                                                                              |
| Chang et al. (Korea) [15]                                                                                                     | Prelingual ANSD | DFNB9     | 5 families (10 alleles)                                | p.Arg1939Gln (7/10, 70.0%)<br>p.Arg1856Trp (1/10, 10.0%)                                                                                       | p.Glu856Lys (1/10, 10.0%)<br>Large genomic deletion (1/10, 10.0%)                                                                                                                         |
| Matsunaga et al. (Japan) [21]                                                                                                 | Congenital ANSD | DFNB9     | 13 families (26 alleles)                               | p.Arg1939Gln (20/26, 76.9%)                                                                                                                    | p.Tyr474Ter (1/26, 3.8%)<br>p.Tyr1822Ter (1/26, 3.8%)<br>IVS9+5G>A (1/26, 3.8%)<br>c.1946-1965del20 (1/26, 3.8%)<br>Extension variant (1/26, 3.8%)<br>non-truncating variant (1/26, 3.8%) |

Note <sup>a</sup>: We have summarized the genotyping profile of prelingual ANSD from East Asian papers, including ours, if at least 5 unrelated *OTOF* families are included
